# Supplementary material for: Ultra-rare complement factor 8 coding variants in families with age-related macular degeneration
Source: PubMed Central journal article supplement (PMC10156737; doi:10.1016/j.isci.2023.106417), 2023-04-03
Supplement: mmc1.pdf [file mmc1.pdf]

**Supplemental information**

**Ultra-rare complement factor 8 coding variants  
in families with age-related macular degeneration**

**Lina Zelinger, Tammy M. Martin, Jayshree Advani, Laura Campello, Milton A. English, Alan Kwong, Claire Weber, Jennifer Maykoski, Yuri V. Sergeev, Robert Fariss, Emily Y. Chew, Michael L. Klein, and Anand Swaroop**

## Supplemental item titles and legends

Table S2 – Variants in C8A and C8B identified in the study, Related to Figure 1 and 2.

|                           | Variant 1         | Variant 2         |
|---------------------------|-------------------|-------------------|
| Gene                      | C8A               | C8B               |
| Ref Transcript            | NM_000562         | NM_000066         |
| Change DNA                | c.G1331A          | c.G1144T          |
| Change Protein            | p.R444H           | p.D382Y           |
| Genomic Position (GRCh38) | chr1:56908064     | chr1:56943786     |
| RS_ID                     | rs143908758       | rs139498867       |
| Ref Allele                | G                 | G                 |
| Alt Allele                | A                 | T                 |
| ExAC_ALL                  | 0.004             | 0.0042            |
| gnomAD                    | 0.003971          | 0.006335          |
| SIFT                      | deleterious       | deleterious       |
| Polyphen                  | probably_damaging | possibly_damaging |
| CADD Score                | 32                | 28.2              |
| # of families identified  | 1                 | 3                 |

Table S3 – Protein stability calculation by FoldX, Related to Figure 3.

| Subunit protein         | C8 complex          |                           | Individual subunit   |                             |
|-------------------------|---------------------|---------------------------|----------------------|-----------------------------|
|                         | $\Delta G$ kcal/mol | $\Delta\Delta G$ kcal/mol | $\Delta G$ ,kcal/mol | $\Delta\Delta G$ , kcal/mol |
| C8A, reference sequence | 495.5               | -                         | 233.84               | -                           |
| C8A, R444H substitution | 462.3               | -33.2                     | 231.51               | -2.34                       |
| C8B, reference sequence | 495.5               | -                         | 230.05               | -                           |
| C8B, D382Y substitution | 418.6               | -43.7                     | 193.05               | -37                         |

## Supplementary figures and legends

Figure S1 – Pathogenicity prediction and DNA level conservation of identified variants in C8A and C8B genes, Related to Figure 2.

Pathogenicity predictions are taken from gnomAD server from Broad Institute (<https://gnomad.broadinstitute.org/>). DNA level conservation is from 100 vertebrate track (PhyloP) in UCSC genome browser.

A

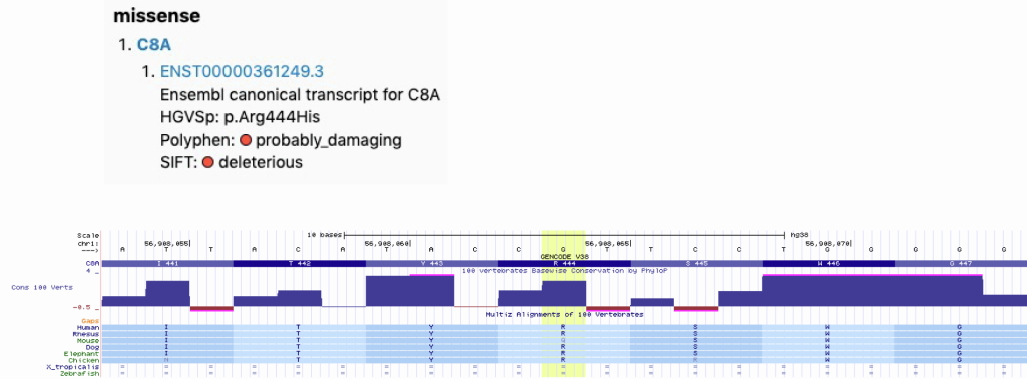

B

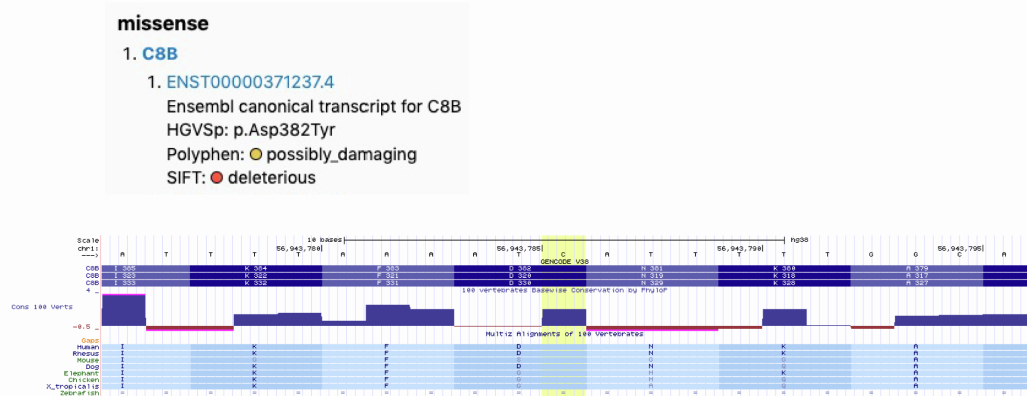

Figure S2 – Effect of variants on C8 complex subunits interaction, Related to Figure 3.

A

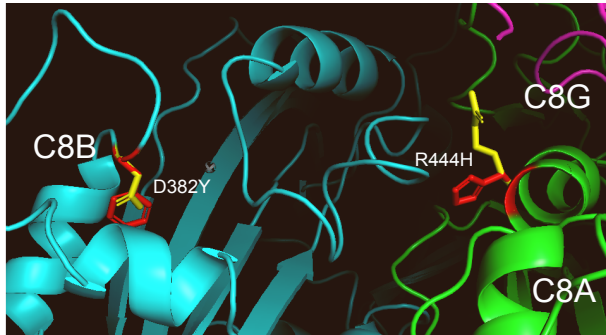

B

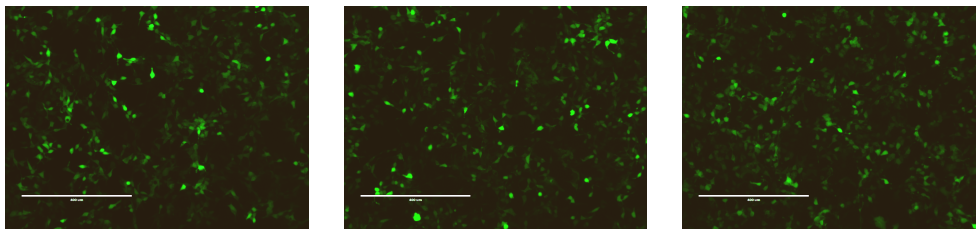

C8A\_WT/C8B\_WT/C8G    C8A\_WT/C8B\_Mut/C8G    C8A\_Mut/C8B\_WT/C8G

A. Snapshot of the C8 complex structure, showing both variants in red and WT residues in yellow. B. Representative images of transfection efficiency of different plasmid combinations in HEK293 cells. WT: wild type sequence; Mut: ultra-rare sequence variant.
